# Supplementary material for: The impact of the COVID-19 pandemic on maternal healthcare costs: a time series analysis of pregnancies of multi-ethnic mothers in South London, United Kingdom
Source: Springer Nature journal article supplement (doi:10.1186/s12916-025-04165-0), 2025-07-01
Supplement: MOESM1 [file 12916_2025_4165_MOESM1_ESM.docx]

Additional File 1

[Table S1. Members of the RESILIENT Study Group 3](#_Toc193783822)

[Table S2. Members of the The Early Life Cross Linkage in Research, Born in South London (eLIXIR-BiSL) Partnership 4](#_Toc193783823)

[Box S1. Details on pregnancy costing methods 6](#_Toc193783824)

[Table S3: Sources of each utilisation component 8](#_Toc193783825)

[Table S4: Sources of control variables and their definitions 8](#_Toc193783826)

[Box S2. Details on the ITS model predicting the impact of the pandemic on monthly maternity costs – Model specification 10](#_Toc193783827)

[Box S3. Maternal organ system involved in medical conditions, as recorded at the registration visit 12](#_Toc193783828)

[Box S4. Definition of GDm-Health app user 13](#_Toc193783829)

[Box S5. Dealing with missing data in primary care 14](#_Toc193783830)

[Figure S1. Breakdown of total costs over the three pandemic periods 15](#_Toc193783831)

[Table S5. Healthcare utilisation by care type and pandemic period 16](#_Toc193783832)

[Figure S3. Percentage of virtual routine antenatal care over time 17](#_Toc193783833)

[Table S6. Comparison of characteristics between GDm-Health app users and non-users 18](#_Toc193783834)

[Table S7. Predicted and counterfactual monthly pregnancy costs 19](#_Toc193783835)

[Box S6. ITS model results for each healthcare services component 20](#_Toc193783836)

[Table S8. Parameter estimates from the ITS model assessing the impact of the pandemic on monthly pregnancy costs – By ethnicity 25](#_Toc193783837)

[Table S9. Predicted and counterfactual monthly pregnancy costs – By ethnicity 26](#_Toc193783838)

[Figure S4. Predicted monthly pregnancy costs and the impact of implementing and lifting the lockdowns – By ethnicity 28](#_Toc193783839)

[Table S10. Parameter estimates from the cross-sectional models assessing the impact of virtual care on utilisation types and delivery costs 29](#_Toc193783840)

[Table s11. Parameter estimates from the cross-sectional models assessing the impact of self-monitoring on utilisation types and delivery costs 31](#_Toc193783841)

[Table S12. The impact of virtual care on pregnancy costs by subgroups 32](#_Toc193783842)

[Table S13. The impact of GDM app registration on pregnancy costs by subgroups 34](#_Toc193783843)

[Table S14. Goodness of fit measures comparing OLS to GLM with gamma distribution and log link 36](#_Toc193783844)

[Table S15. Results of sensitivity analyses for ITS Model assessing the impact of the pandemic on monthly pregnancy costs - Removing primary care from pregnancy costs 37](#_Toc193783845)

[Table S16. Results of sensitivity analyses for ITS Model assessing the impact of the pandemic on monthly pregnancy costs -Changing routine antenatal costing assumption 38](#_Toc193783846)

[Table S17. Results of sensitivity analyses for ITS Model assessing the impact of the pandemic on monthly pregnancy costs -Changing the start of the pandemic period from July 2021to August 2021 38](#_Toc193783847)

# Table S1. Members of the RESILIENT Study Group

| **Chief Investigator** |  |
| --- | --- |
| Professor Laura A. Magee | Professor of Women’s Health, King's College London (KCL) |
| **Co-investigators** |  |
| Professor Debra Bick | Professor of Clinical Trials in Maternal Health, Warwick Clinical Trials Unit, University of Warwick |
| Dr Harriet Boulding | Research Fellow, The Policy Institute at King's, KCL |
| Dr Kathryn Dalrymple | Lecturer in Nutritional Sciences, KCL |
| Ms Alice McGreevy | Research Assistant in Health Economics, KCL |
| Professor Peter von Dadelszen | Professor of Global Women's Health, KCL |
| Professor Emma L Duncan | Professor of Clinical Endocrinology, Twin Research & Genetic Epidemiology, KCL |
| Dr Abigail Easter | Senior Lecturer in Maternal & Newborn Health, KCL |
| Professor Julia Fox-Rushby | Professor of Health Economics, KCL |
| Professor Asma Khalil | Professor of Obstetrics and Maternal Fetal Medicine, St George's University Hospitals NHS Foundation Trust |
| Dr Hiten D. Mistry | Senior Research Fellow, Department of Women and Children's Health, KCL |
| Professor Eugene Nelson | Professor of Community and Family Medicine, The Geisel School of Medicine at Dartmouth, The Dartmouth Institute, USA |
| Professor Lucilla Poston, CBE | Tommy's Charity Professor of Maternal & Fetal Health; Head, School of Life Course Sciences, KCL |
| Mr Sergio A. Silverio | Research Associate in Social Science of Women’s Health, KCL |
| Dr Marina Soley-Bori | Lecturer in Health economics, KCL |
| Dr Florence Tydeman | Research Associate in Medical Statistics, KCL |
| Ms. Arica Van Citters | Senior Research Scientist, The Dartmouth institute for Health Policy and Clinical Practice, Hanover, USA |
| Dr Sara White | I am Clinical Senior Lecturer and maternal diabetes clinical research lead, and honorary consultant in metabolic medicine. |
| Dr Ingrid Wolfe | Director, Institute of Women and Children’s Health, KCL |
| Wang Yangzhong | Professor of Statistics and Head of Medical Statistics, KCL |

# Table S2. Members of the The Early Life Cross Linkage in Research, Born in South London (eLIXIR-BiSL) Partnership

| **Member** | **Role** |
| --- | --- |
| Professor Lucilla Poston | eLIXIR-BiSL Chief Investigator, and Professor of Maternal & Fetal Health, Department of Women and Children’s Health, School of Life Course and Population Sciences, King’s College London |
| Professor Laura A Magee | Professor of Women’s Health, Department of Women and Children’s Health, School of Life Course and Population Sciences, King’s College London |
| Professor Robert Stewart | Professor of Psychiatric Epidemiology & Clinical Informatics, Department of Psychological Medicine, Institute of Psychiatry, Psychology and Neuroscience, King’s College London and NIHR Maudsley Biomedical Research Centre, South London and Maudsley NHS Foundation Trust, London. Consultant Psychiatrist at South London and Maudsley NHS Foundation Trust, London |
| Professor David Edwards | Chair in Paediatrics & Neonatal Medicine, Department of Perinatal Imaging and Health, King’s College London. Neonatal Consultant at Guy’s and St. Thomas’ NHS Foundation Trust |
| Professor Mark Ashworth | Professor of Primary Care, Department of Population Health Sciences, School of Life Course and Population Sciences, King’s College London |
| Professor Jane Sandall | Professor of Social Science & Women’s Health, Department of Women and Children’s Health, School of Life Course and Population Sciences, King’s College London |
| Dr Ingrid Wolfe | Professor of Paediatrics and Child Population Health, Department of Women and Children’s Health, School of Life Course and Population Sciences, King’s College London and Consultant in Children's Public Health Medicine and Director of the Evelina London Children’s Healthcare |
| Dr Cheryl Gillett | Head of Tissue Banking, Department of Comprehensive Cancer Centre, School of Cancer & Pharmaceutical Sciences, King’s College London |
| Dr Michael Absoud | Paediatric Consultant at Evelina London Children’s Healthcare |
| Dr Lucy Pickard | Consultant Paediatrician, King’s College Hospital NHS Foundation Trust |
| Ms Amanda Grey | Lay member of the eLIXIR Oversight Committee |
| Ms Sarah Spring | Lay member of the eLIXIR Oversight Committee |
| Ms Toyin Kazeem | Information Governance Operations Lead, South London and Maudsley NHS Foundation Trust, London |
| Ms Amelia Jewell | Clinical Data Linkage Service Lead, NIHR Maudsley Biomedical Research Centre, South London and Maudsley NHS Foundation Trust |
| Mr Matthew Broadbent | CRIS Clinical Informatics Lead, NIHR Maudsley Biomedical Research Centre, South London and Maudsley NHS Foundation Trust, London |
| Ms Finola Higgins | Research Informatics Programme Manager, Guy’s and St Thomas’ NHS Foundation Trust |
| Mr Leonardo de Jongh | Data Warehouse Manager, Guy’s and St. Thomas’s Hospital NHS Foundation Trust |
| Ms Tisha Dasgupta | Research Associate and eLIXIR Coordinator, Department of Women & Children’s Health, School of Life Course and Population Sciences, King’s College London |
| Dr Carolyn Gill | School Bioresource Manager, School of Life Course and Population Sciences, King’s College London. |

# Box S1. Details on pregnancy costing methods

| **Cost Component** | **Costing Method** |
| --- | --- |
| Delivery costs | Costed per delivery type:   1. Normal delivery (Currency codes NZ30A - NZ34C): £3,296.47 2. Assisted delivery (NZ40A - NZ44C): £5,220.49 3. Elective caesarean section (NZ50A - NZ50C): £5,032.21 4. Emergency caesarean section (NZ51A - NZ51C): £7,193.10 5. Not specified (NZ25Z): £2,411.00   Only 0.4% of the sample was ‘Not specified’. |
| Routine Antenatal Appointments | Costed per appointment, using weighted average unit costs from currency codes WF01A – WF02D for service codes 501 and 560. Costing for each pregnancy was based on whether a woman’s care plan was recorded as “Midwife only”, “Shared (Obstetrician and Midwife)” or “Obstetrician only”. ‘Midwife only’ was costed as 100% provided by midwives, and ‘Obstetrician only’ was costed as 100% obstetrician. Shared care was costed as 75% Midwife, 25% Obstetrician. The rationale for this was that women with Midwife only care had ~75% the number of appointments as the ‘Shared’ group, and therefore it was assumed that all appointments above the 75% were conducted by an Obstetrician. As a sensitivity analysis, ‘Shared care’ was costed as 90% Midwife, 10% Obstetrician also and the results for all three models did not change.  Mode of delivery (face-to-face or virtual) was also considered when selecting average unit costs. An appointment was deemed to have been ‘virtual’ if: (i) maternal blood pressure (BP), dipstick proteinuria, and fetal heart rate (FHR - after 16 weeks gestation) were missing from the visit record; or (ii) notes from the appointment contained one/more of the terms, ‘virtual’, ‘telephone’, ‘phone’, ‘call’, or ‘zoom’. Otherwise, the appointment was considered to have taken place face-to-face.  Antenatal appointments (‘follow-up’ appointments):   1. Midwife only - £107 face-to-face (F2F), £78 virtual. 2. Shared - £126 F2F, £96 virtual. 3. Obstetrician only - £183 F2F, £152 virtual.   Antenatal registration appointments for all women were costed as a midwife ‘First’ appointment - £177 F2F, £143 virtual. |
| Maternity Assessment Unit | Costed at £161 per visit. Calculated using the weighted average cost of ‘Outpatient procedures’ for currency codes NZ22Z to NZ24B1. |
| Inpatient stays | Costed per stay, using weighted average unit costs from currency codes NZ16Z-NZ27Z1:   1. Daycase - £330 2. Non-elective short stay (<5 days) - £560 3. Non-elective long stay (>=5 days) - £2,863   The cut-off point of 5 days is based on the trimpoints for maternity prices from the NHS National Tariffs. |
| Postnatal reviews | Costed at £142 per visit, the unit cost of an outpatient procedure for currency code NZ27Z. |
| Mental Health – Talking Therapy appointments | Costed per appointment based on the duration, provider type (Therapist, Psychologist etc.) and delivery type (face-to-face, group session etc.). The cost per hour of the provider type is multiplied by the duration of the appointment, and adjusted for delivery type where appropriate. Cost per hour for provider type is obtained from the PSSRU manual.  For example, a 30-minute face-to-face appointment with a Cognitive Behavioural Therapy (CBT) Therapist, with an hourly cost of £66 per hour, would be 66*(30/60) = £33. |
| Mental Health – community contact appointments | Same as talking therapy appointments. |
| Mental Health – Inpatient stays | Costed at £1,070 per bed day (‘Specialist perinatal – admitted’). |
| Primary care appointments | Costed per appointment based on the duration, provider type (GP, Nurse etc.) and delivery type (face-to-face, telephone etc.). Both average durations of appointments and costs per hour for provider type were obtained from the PSSRU manual.  For example, a face-to-face GP consultation (average duration 9.22) would be costed at £265 * (9.22/60) = £40.72. |

# Table S3: Sources of each utilisation component

| **Utilisation component** | **Source** |
| --- | --- |
| Routine antenatal appointments | BadgerNet |
| Maternity assessment unit | BadgerNet |
| Delivery information | BadgerNet |
| Inpatient stays | BadgerNet |
| Postnatal reviews | BadgerNet |
| Mental health (IAPT, community contacts and mental health inpatient stays) | South London and Maudsley (SLAM) Clinical Record Interactive Search (CRIS) |
| Primary care | The Lambeth DataNet |

All control variables came from BadgerNet, and Table S4 lists their definition.

# Table S4: Sources of control variables and their definitions

| **Variable** | **Definition** |
| --- | --- |
| Age | Continuous (years) |
| Ethnicity | Categorical: White, Black, Asian, Mixed, Other, NA |
| Difficulty speaking English | Binary (yes/no) |
| Socioeconomic deprivation (IMD) | Categorical. Quintiles, ranging from 1 for Most deprived to 5 for least deprived |
| Multiple birth | Binary indicator if the woman delivered one than one baby (yes / no) |
| Gestational age at booking | Continuous (weeks) |
| Smoking status | Binary if the woman is a current smoker at booking appointment (smoker / non-smoker) |
| Antenatal care plan type | Categorical. Midwife only, shared (obstetrician and midwife) or obstetrician only. |
| GDM | Binary indicator if the woman has GDM (yes/no) |
| One or more health conditions | Binary (yes/no) if the women indicated a health condition at booking appointment. The categories are:   | - Haematological | | --- | | - Thrombosis | | - Cardiac | | - Hypertension | | - Renal | | - Asthma | | - Lung disorders | | - Endocrine | | - Autoimmune | | - Epilepsy | | - Neurological | | - Gastrointestinal | | - Gynaecological | | - Liver | | - Bone disorders | | - Joint disorders | | - Back problems | | - Genetic disorders | | - Congenital abnormality | | - Other medical problems | |
| Hospital providing care | Categorical. Hospital name. |

# Box S2. Details on the ITS model predicting the impact of the pandemic on monthly maternity costs – Model specification

| The ITS equation is specified as follows:      ( 1 )  *Time* is the number of months elapsed since the start of the study and captures the linear trend, and *Pandemic* is a dummy variable indicating the COVID-19 period (coded 1 for months between March 2020 and June 2021, otherwise 0). *PostLockdown* is a dummy variable indicating the post-lockdown period (coded 1 for months from July 2021 onwards, otherwise 0). accounts for correlation in costs of women within the same hospital. Monthly dummy variables are included to adjust for seasonality. represents the lagged residuals. Inspection of the autocorrelation and partial autocorrelation functions identified correlation among observations of the same individual over time (autocorrelation); to adjust for this, the model was first run without ., and then the residuals from this model were extracted and lagged, and added as an explanatory variable for the main model (32). ITS models account for time-invariant covariates unless there are changes in the characteristics of the underlying population that might explain observed changes over the study period. As such, temporal trends in covariates (ethnicity, social deprivation, maternal age, GDM) were plotted and checked for stability. As there were changes in the ethnicity composition of the population, this was added as a control variable in the ITS model. The percentage of deliveries each month (a key cost-driver) was also unstable over the study period; to control for this, a binary variable, , was added to reflect the month in which the woman gave birth (**Figures S1-S4**, right below).  To calculate the counterfactual line presented in Figure 1 in the manuscript and Table S6, the ‘Predicted’ function from R package “stats” was used, using the model output from the model specification in equation 1. However, instead of inputting the original dataset, a counterfactual dataset was used where the *Pandemic* and *PostLockdown* variables were put equal to ‘0’ for all observations. This provides predicted values that continue the pre-pandemic trend, and do not apply the *Pandemic* and *PostLockdown* estimates. |
| --- |

# Box S3. Maternal organ system involved in medical conditions, as recorded at the registration visit

| - Haematological - Thrombosis - Cardiac - Hypertension - Renal - Asthma - Lung disorders - Diabetes - Endocrine - Autoimmune - Epilepsy | - Neurological - Gastrointestinal - Gynaecological - Liver - Bone disorders - Joint disorders - Back problems - Genetic disorders - Congenital abnormality - Mental health - Other medical problems |
| --- | --- |

Notes: These medical conditions were converted into a binary variable equal to 1 if the individual had at least one of them, 0 otherwise.

# Box S4. Definition of GDm-Health app user

Individuals were considered as GDm-Health app users if they had a GDM diagnosis and evidence of sufficient active app usage. Sufficient app usage required a rate of readings per total days on the app of 1, a total length of app usage of at least 7 days, and at least 7 glucose readings over the app usage duration period. The code logic is as follows:

GDM Health Users == “Yes” is a further subset of GDM Health Diagnosis for those who have evidence of app active usages. (Step 1)

Those with “Reason for Closing” within the list of “non-user implications” then GDM_Health_Use == “No” e.g., non-user. (Step 2)

If the Rate_of_readings_per_day < 10th percentile of readings (~1 reading per day) then GDM_Health_Use == “No” OR

if Total Number of Gluscose Readings < 7 readings, then GDM_Health_Use == “No” OR

if the length_of_time_on_app (in days) < 7 days, then GDM_Health_Use == “No”.

# Box S5. Dealing with missing data in primary care

Multiple imputation via Chained Equations (MICE) was conducted using the MICE package in R. Predictor variables in the multiple imputation model for primary care costs included:

- - 1. IMD quintiles (missing labelled as “missing”)
    2. Ethnicity (missing labelled as “missing”)
    3. Maternal age at antenatal registration (continuous)
    4. Hospital (GSTT/KCH)
    5. Gestational age at start of month:
       1. 0-12 weeks – “First”
       2. 13-27 – “Second”
       3. 28+ - “Third”
       4. If delivered – “Delivered”.
    6. Nulliparous – first time mum (y/n)
    7. Smoker at antenatal registration (y/n/missing)
    8. Care type (Midwife / Shared / Obstetrician / Missing)
    9. Multiple birth (y/n)
    10. Date_month
    11. BadgerNet Cost

Results of MICE indicate overlapping primary care cost distributions between individuals with imputed (purple) and observed (pink) primary care costs, as displayed in the histograms right below.

**Figure comparing imputed and observed primary care cost distributions**


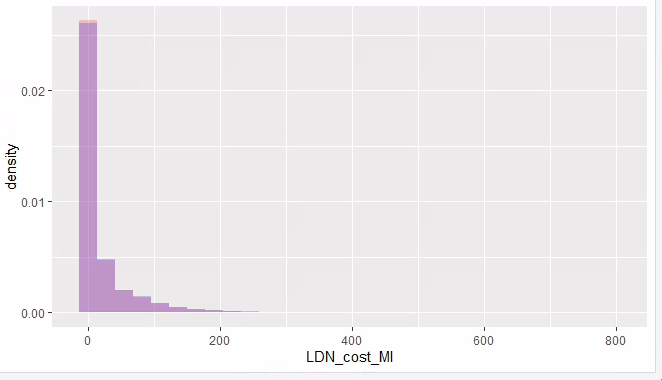


Legend: Purple = imputed population, Pink = In LDN dataset.

Descriptive statistics also support the similarity between the imputed and observed primary care cost groups.

**Table comparing imputed and observed primary care cost descriptives**

| Group | Average cost | Median cost | Standard deviation | Min cost | Max cost |
| --- | --- | --- | --- | --- | --- |
| Primary care costs -Imputed | 21.1 | 0 | 44.8 | 0 | 792 |
| Primary care costs -Observed | 20.3 | 0 | 43.7 | 0 | 792 |

# Figure S1. Breakdown of total costs over the three pandemic periods


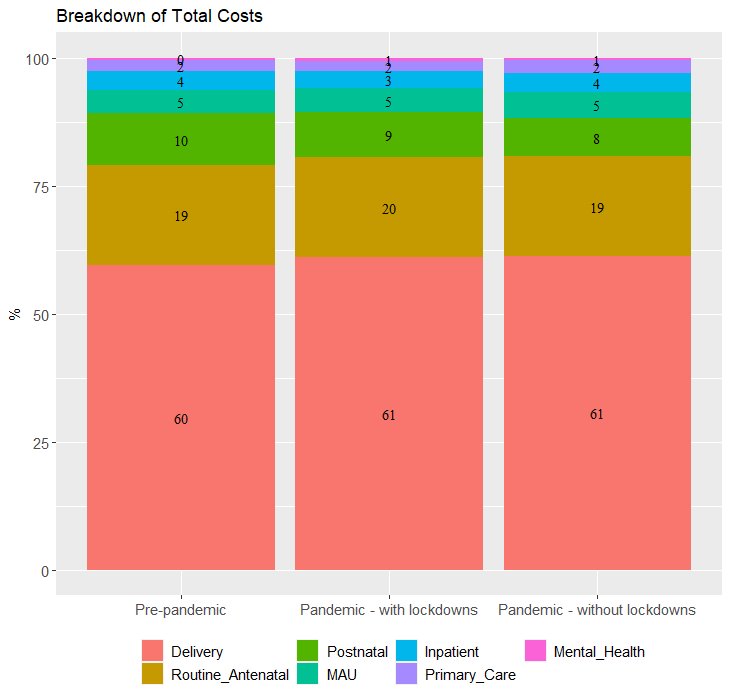


# Table S5. Healthcare utilisation by care type and pandemic period

|  | Pre-pandemic | Pandemic with lockdowns1 | Pandemic without lockdowns2 |
| --- | --- | --- | --- |
|  | N=13,284 | N=11,470 | N=10,233 |
| Routine antenatal | 10.38 (6.26) | 12.56 (5.74)*** | 12.19 (5.99)*** |
| Maternity assessment unit | 2.12 (2.00) | 2.32 (2.17)*** | 2.65 (2.55)*** |
| Post-natal review | 5.46 (4.04) | 4.70 (4.16)*** | 4.13 (3.90)*** |
| Primary care | 5.95 (5.42) | 6.53 (6.79)*** | 7.22 (7.25) *** |
| Talking therapy | 0.18 (1.27) | 0.26 (1.61)*** | 0.23 (1.44)*** |
| Mental health community contacts | 0.21 (2.11) | 0.37 (3.5) | 0.36 (2.71)*** |
| Mental health Inpatient stay days | 0.01 (0.53) | 0.03 (1.02) | 0.01 (0.7) |

1 The stars indicate statistical significance corresponding to the t-tests (Mann–Whitney U) comparing mean utilisation during the pandemic with lockdowns to pre-pandemic. 2 The stars indicate statistical significance corresponding to the t-tests (Mann–Whitney U) comparing mean utilisation during the pandemic without lockdowns to pre-pandemic. *** <0.001; ** <0.01; * <0.05. Means are presented with standard errors in parenthesis.

# Figure S3. Percentage of virtual routine antenatal care over time

# Table S6. Comparison of characteristics between GDm-Health app users and non-users

| **Characteristic** | **Users**  N = 3,215 pregnancies | **Non-users**  N = 1,050 pregnancies | **p-value** |
| --- | --- | --- | --- |
| Maternal age at registration | 34.07, (5.26) | 33.97, (5.36) | >0.9 |
| English as first language | 2,083 (65%) | 623 (59%) | 0.002 |
| Difficulty speaking English | 286 (8.9%) | 114 (11%) | 0.067 |
| Mental health condition | 756 (24%) | 220 (21%) | 0.094 |
| Ethnicity |  |  | <0.001 |
| White | 1,060 (33%) | 349 (33%) |  |
| Black | 941 (29%) | 249 (24%) |  |
| Asian | 628 (20%) | 188 (18%) |  |
| Mixed | 153 (4.8%) | 41 (3.9%) |  |
| Other | 304 (9.5%) | 93 (8.9%) |  |
| Missing | 129 (4.0%) | 130 (12%) |  |
| IMD quintile |  |  | 0.4 |
| 1 (most deprived) | 743 (23%) | 245 (23%) |  |
| 2 | 1,326 (41%) | 443 (42%) |  |
| 3 | 709 (22%) | 230 (22%) |  |
| 4 | 265 (8.2%) | 69 (6.6%) |  |
| 5 (least deprived) | 116 (3.6%) | 48 (4.6%) |  |
| Missing | 56 (1.7%) | 15 (1.4%) |  |

Notes:p-values correspond to t-tests (Mann–Whitney U-test for continuous variables) and Pearson Chi-Squared tests (for categorical variables).

App users and non-users were similar in terms of maternal age at antenatal registration (~34 years), difficulty speaking English (~10%), prevalence of mental health conditions (just over 20%), and IMD distribution (~65% deprived). However, app users (vs. non-users) were more likely to speak English as their primary language (65% vs. 59%, p-value=0.002) and had a slightly different ethnicity distribution (p-value<0001), characterised by a lower percentage of individuals with missing ethnicity (4% vs. 12%) and slightly higher percentages of individuals of Black (29% vs. 24%), Asian (20% vs. 18%), mixed (5% vs. 4%), and other ethnicity (10% vs. 9%).

# Table S7. Predicted and counterfactual monthly pregnancy costs

|  | **Average predicted cost** | **95% CI** | **Average predicted cost of counterfactual** | **Relative Rate** |
| --- | --- | --- | --- | --- |
| Jun-19 | 1009.46 | (990.66,1028.26) | 1009.46 | 1.00 |
| Jul-19 | 986.34 | (968.87,1003.8) | 986.34 | 1.00 |
| Aug-19 | 981.08 | (964.49,997.67) | 981.08 | 1.00 |
| Sep-19 | 984.91 | (968.83,1000.98) | 984.91 | 1.00 |
| Oct-19 | 1019.93 | (1003.99,1035.86) | 1019.93 | 1.00 |
| Nov-19 | 983.20 | (967.07,999.34) | 983.20 | 1.00 |
| Dec-19 | 997.72 | (981.05,1014.39) | 997.72 | 1.00 |
| Jan-20 | 1070.19 | (1052.48,1087.9) | 1070.19 | 1.00 |
| Feb-20 | 960.61 | (941.81,979.4) | 960.61 | 1.00 |
| Mar-20 (start of pandemic lockdowns) | 990.83 | (973.38,1008.29) | 1023.93 | 0.97 |
| Apr-20 | 920.38 | (903.02,937.74) | 953.02 | 0.97 |
| May-20 | 967.95 | (950.4,985.49) | 1000.12 | 0.97 |
| Jun-20 | 962.21 | (945.8,978.62) | 993.93 | 0.97 |
| Jul-20 | 1038.13 | (1022.19,1054.08) | 1069.40 | 0.97 |
| Aug-20 | 947.40 | (931.75,963.06) | 978.21 | 0.97 |
| Sep-20 | 1052.42 | (1036.86,1067.99) | 1082.77 | 0.97 |
| Oct-20 | 1045.61 | (1030.04,1061.17) | 1075.50 | 0.97 |
| Nov-20 | 987.04 | (971.47,1002.6) | 1016.47 | 0.97 |
| Dec-20 | 907.22 | (891.5,922.94) | 936.20 | 0.97 |
| Jan-21 | 990.88 | (974.71,1007.05) | 1019.40 | 0.97 |
| Feb-21 | 962.23 | (945.68,978.78) | 990.30 | 0.97 |
| Mar-21 | 1023.37 | (1006.6,1040.14) | 1050.98 | 0.97 |
| Apr-21 | 975.77 | (958.67,992.88) | 1002.92 | 0.97 |
| May-21 | 989.54 | (971.77,1007.31) | 1016.23 | 0.97 |
| Jun-21 | 989.24 | (971.72,1006.76) | 1015.48 | 0.97 |
| Jul-21 (start of post-lockdown period) | 1044.50 | (1028.04,1060.97) | 1093.83 | 0.95 |
| Aug-21 | 1004.69 | (988.47,1020.9) | 1053.14 | 0.95 |
| Sep-21 | 1049.62 | (1033.57,1065.67) | 1097.20 | 0.96 |
| Oct-21 | 1104.55 | (1088.54,1120.57) | 1151.26 | 0.96 |
| Nov-21 | 1097.03 | (1081.09,1112.96) | 1142.86 | 0.96 |
| Dec-21 | 1034.37 | (1018.44,1050.3) | 1079.33 | 0.96 |
| Jan-22 | 1038.82 | (1022.7,1054.93) | 1082.90 | 0.96 |
| Feb-22 | 977.37 | (961.07,993.67) | 1020.58 | 0.96 |
| Mar-22 | 1100.03 | (1084.11,1115.94) | 1142.36 | 0.96 |
| Apr-22 | 1054.07 | (1037.98,1070.17) | 1095.53 | 0.96 |

Notes: Analyses were based on data up to April 2023 (results available upon request).

# Box S6. ITS model results for each healthcare services component

**Table 1. Parameter estimates from the ITS model assessing the impact of the pandemic on monthly antenatal appointments**

| **Control** | **Parameter estimate** | **95% CI** |
| --- | --- | --- |
| Constant | 0.07*** | (0.04, 0.10) |
| Time | 0.01** | (0.003, 0.01) |
| Pandemic lockdowns - change in level | 0.08*** | (0.05, 0.12) |
| Pandemic lockdowns - change in slope | 0.002 | (-0.002, 0.01) |
| Post lockdown - change in level | 0.15*** | (0.11, 0.19) |
| Post lockdown - change in slope | -0.003 | (-0.01, 0.002) |
| Notes: *p<0.05; **p<0.01; ***p<0.001. Model also controls month, hospital, lagged residuals, and ethnicity. The ‘time’ estimate represents the monthly pre-pandemic slope. | | |

| **Control** | **Parameter estimate** | **95% CI** |
| --- | --- | --- |
| Constant | 133.35*** | (128.31, 138.40) |
| Time | 0.96** | (0.27, 1.64) |
| Pandemic lockdowns - change in level | 0.88 | (-4.89, 6.64) |
| Pandemic lockdowns - change in slope | 0.66 | (-0.05, 1.37) |
| Post lockdown - change in level | 10.83** | (3.11, 18.54) |
| Post lockdown - change in slope | -0.04 | (-0.74, 0.65) |
| Notes: *p<0.05; **p<0.01; ***p<0.001. Model also controls month, hospital, lagged residuals, and ethnicity. The ‘time’ estimate represents the monthly pre-pandemic slope. | | |

**Table 2. Parameter estimates from the ITS model assessing the impact of the pandemic on monthly antenatal costs**

**Table 3. Parameter estimates from the ITS model assessing the impact of the pandemic on monthly MAU appointments**

| **Control** | **Parameter estimate** | **95% CI** |
| --- | --- | --- |
| Constant | -1.96*** | (-2.03, -1.90) |
| Time | 0.03*** | (0.02, 0.04) |
| Pandemic lockdowns - change in level | -0.11** | (-0.19, -0.04) |
| Pandemic lockdowns - change in slope | -0.01* | (-0.02, -0.003) |
| Post lockdown - change in level | -0.59*** | (-0.68, -0.49) |
| Post lockdown - change in slope | -0.001 | (-0.01, 0.01) |
| Notes: *p<0.05; **p<0.01; ***p<0.001. Model also controls month, hospital, lagged residuals, and ethnicity. The ‘time’ estimate represents the monthly pre-pandemic slope. | | |

**Table 4. Parameter estimates from the ITS model assessing the impact of the pandemic on monthly MAU costs**

| **Control** | **Parameter estimate** | **95% CI** |
| --- | --- | --- |
| Constant | 19.32*** | (16.27, 22.38) |
| Time | 1.32*** | (0.91, 1.73) |
| Pandemic lockdowns - change in level | -3.31* | (-6.60, -0.03) |
| Pandemic lockdowns - change in slope | -0.70** | (-1.13, -0.28) |
| Post lockdown - change in level | -36.03*** | (-40.97, -31.09) |
| Post lockdown - change in slope | 0.17 | (-0.25, 0.59) |
| Notes: *p<0.05; **p<0.01; ***p<0.001. Model also controls month, hospital, lagged residuals, and ethnicity. The ‘time’ estimate represents the monthly pre-pandemic slope. | | |
|  | | |

**Table 5. Parameter estimates from the ITS model assessing the impact of the pandemic on monthly postnatal appointments**

| **Control** | **Parameter estimate** | **95% CI** |
| --- | --- | --- |
| Constant | -2.85** | (-2.92, -2.78) |
| Time | 0.0000 | (-0.01, 0.01) |
| Pandemic lockdowns - change in level | -0.11** | (-0.19, -0.04) |
| Pandemic lockdowns - change in slope | -0.01* | (-0.02, -0.003) |
| Post lockdown - change in level | -0.59*** | (-0.68, -0.49) |
| Post lockdown - change in slope | -0.001 | (-0.01, 0.01) |

| **Control** | **Parameter estimate** | **95% CI** |
| --- | --- | --- |
| Constant | -0.23 | (-5.71, 5.25) |
| Time | -0.46 | (-1.23, 0.32) |
| Pandemic lockdowns - change in level | -7.36* | (-13.79, -0.93) |
| Pandemic lockdowns - change in slope | -0.05 | (-0.86, 0.76) |
| Post lockdown - change in level | -12.87** | (-21.04, -4.70) |
| Post lockdown - change in slope | 0.13 | (-0.65, 0.91) |
| Notes: *p<0.05; **p<0.01; ***p<0.001. Model also controls month, hospital, lagged residuals, and ethnicity. The ‘time’ estimate represents the monthly pre-pandemic slope. | | |

**Table 6. Parameter estimates from the ITS model assessing the impact of the pandemic on monthly postnatal costs**

**Table 7. Parameter estimates from the ITS model assessing the impact of the pandemic on monthly delivery costs**

| **Control** | **Parameter estimate** | **95% CI** |
| --- | --- | --- |
| Constant | 4,674.56*** | (554.04, 652.27) |
| Time | 9.29 | (-2.41, 11.18) |
| Pandemic lockdowns - change in level | -19.88 | (-61.09, 52.51) |
| Pandemic lockdowns - change in slope | -3.88 | (-11.69, 2.43) |
| Post lockdown - change in level | -54.12*** | (-385.08, -235.59) |
| Post lockdown - change in slope | -1.28 | (-0.16, 13.59) |
| Notes: *p<0.05; **p<0.01; ***p<0.001. Model also controls month, hospital, lagged residuals, and ethnicity. The ‘time’ estimate represents the monthly pre-pandemic slope. | | |

**Table 8. Parameter estimates from the ITS model assessing the impact of the pandemic on monthly primary care users**

| **Control** | **Parameter estimate** | **95% CI** |
| --- | --- | --- |
| Constant | -1.05*** | (-1.09, -1.01) |
| Time | -0.003 | (-0.01, 0.003) |
| Pandemic lockdowns - change in level | -0.14*** | (-0.19, -0.09) |
| Pandemic lockdowns - change in slope | 0.004 | (-0.002, 0.01) |
| Post lockdown - change in level | -0.22*** | (-0.28, -0.17) |
| Post lockdown - change in slope | 0.01** | (0.004, 0.01) |
| Notes: *p<0.05; **p<0.01; ***p<0.001. Dependent variable is a binary outcome, indicating whether the woman accessed primary care that month or not. Model also controls month, hospital, lagged residuals, and ethnicity. The ‘time’ estimate represents the monthly pre-pandemic slope. | | |

**Table 9. Parameter estimates from the ITS model assessing the impact of the pandemic on monthly primary care costs**

| **Control** | **Parameter estimate** | **95% CI** |
| --- | --- | --- |
| Constant | 17.63*** | (16.43, 18.83) |
| Time | 0.14 | (-0.02, 0.29) |
| Pandemic lockdowns - change in level | -2.03** | (-3.38, -0.69) |
| Pandemic lockdowns - change in slope | 0.02 | (-0.14, 0.19) |
| Post lockdown - change in level | -1.91 | (-3.92, 0.09) |
| Post lockdown - change in slope | 0.11 | (-0.05, 0.27) |
| Notes: *p<0.05; **p<0.01; ***p<0.001. Model also controls month, hospital, lagged residuals, and ethnicity. The ‘time’ estimate represents the monthly pre-pandemic slope. | | |

**Table 10. Parameter estimates from the ITS model assessing the impact of the pandemic on monthly IAPT users**

| **Control** | **Parameter estimate** | **95% CI** |
| --- | --- | --- |
| Constant | -4.39*** | (-4.59, -4.19) |
| Time | -0.01 | (-0.04, 0.02) |
| Pandemic lockdowns - change in level | -0.41** | (-0.67, -0.15) |
| Pandemic lockdowns - change in slope | 0.04** | (0.01, 0.07) |
| Post lockdown - change in level | 0.10 | (-0.21, 0.41) |
| Post lockdown - change in slope | 0.01 | (-0.02, 0.04) |
| Notes: *p<0.05; **p<0.01; ***p<0.001. Dependent variable is a binary outcome, indicating whether the woman accessed IAPT services that month or not. Model also controls month, hospital, lagged residuals, and ethnicity. The ‘time’ estimate represents the monthly pre-pandemic slope. | | |
| | **Control** | **Parameter estimate** | **95% CI** | | --- | --- | --- | | Constant | -4.45*** | (-4.63, -4.26) | | Time | -0.02 | (-0.04, 0.01) | | Pandemic lockdowns - change in level | -1.63*** | (-1.92, -1.33) | | Pandemic lockdowns - change in slope | 0.09*** | (0.06, 0.12) | | Post lockdown - change in level | -0.06 | (-0.35, 0.23) | | Post lockdown - change in slope | 0.02 | (-0.003, 0.05) | | Notes: *p<0.05; **p<0.01; ***p<0.001. Dependent variable is a binary outcome, indicating whether the woman accessed community contact services that month or not. Model also controls month, hospital, lagged residuals, and ethnicity. The ‘time’ estimate represents the monthly pre-pandemic slope. | | |   **Table 11. Parameter estimates from the ITS model assessing the impact of the pandemic on monthly community contact users**   | **Control** | **Parameter estimate** | **95% CI** | | --- | --- | --- | | Constant | -11.83*** | (-14.21, -9.45) | | Time | 0.15 | (-0.12, 0.42) | | Pandemic lockdowns - change in level | 0.76 | (-1.68, 3.20) | | Pandemic lockdowns - change in slope | -0.09 | (-0.37, 0.20) | | Post lockdown - change in level | 1.53 | (-1.15, 4.21) | | Post lockdown - change in slope | -0.15 | (-0.42, 0.11) | | Notes: *p<0.05; **p<0.01; ***p<0.001. Dependent variable is a binary outcome, indicating whether the woman had mental health inpatient stays that month or not. Model also controls month, hospital, lagged residuals, and ethnicity. The ‘time’ estimate represents the monthly pre-pandemic slope. | | |   **Table 12. Parameter estimates from the ITS model assessing the impact of the pandemic on monthly mental health inpatient users** | | |

**Table 13. Parameter estimates from the ITS model assessing the impact of the pandemic on monthly mental health costs**

| **Control** | **Parameter estimate** | **95% CI** |
| --- | --- | --- |
| Constant | 0.81*** | (0.69, 0.94) |
| Time | -0.02** | (-0.04, -0.01) |
| Pandemic lockdowns - change in level | 0.01 | (-0.16, 0.17) |
| Pandemic lockdowns - change in slope | 0.02* | (0.01, 0.04) |
| Post lockdown - change in level | -0.17 | (-0.37, 0.04) |
| Post lockdown - change in slope | 0.03** | (0.01, 0.05) |
| Notes: *p<0.05; **p<0.01; ***p<0.001. Model also controls month, hospital, lagged residuals, and ethnicity. The ‘time’ estimate represents the monthly pre-pandemic slope. | | |

| **Control** | **Parameter estimate** | **95% CI** |
| --- | --- | --- |
| Constant | -0.46 | (-4.05, 3.12) |
| Time | 0.08 | (-0.52, 0.68) |
| Pandemic lockdowns - change in level | -5.45 | (-11.27, 0.37) |
| Pandemic lockdowns - change in slope | 4.51 | (-2.29, 11.31) |
| Post lockdown - change in level | 0.39 | (-0.20, 0.98) |
| Post lockdown - change in slope | -0.16 | (-0.73, 0.41) |
| Notes: *p<0.05; **p<0.01; ***p<0.001. Model also controls month, hospital, lagged residuals, and ethnicity. The ‘time’ estimate represents the monthly pre-pandemic slope. | | |

**Table 14. Parameter estimates from the ITS model assessing the impact of the pandemic on mental health use**

# Table S8. Parameter estimates from the ITS model assessing the impact of the pandemic on monthly pregnancy costs – By ethnicity

| **Control** | **White - Baseline** | **Black** | **Asian** | **Mixed** | **Other** | **Missing** |
| --- | --- | --- | --- | --- | --- | --- |
| Pre-pandemic baseline at time=0 | 168.13*** | 4.11 | -42.61 | 1.9 | -23.64 | -57.31* |
|  | (141.61, 194.65) | (-41.98, 50.20) | (-100.20, 14.99) | (-67.23, 71.02) | (-93.28, 45.99) | (-102.92, -11.70) |
| Pre-pandemic trend (per month) | 0.56 | 6.53 | 13.69** | -0.87 | 10.74 | -1.93 |
|  | (-3.35, 4.48) | (-1.84, 14.91) | (3.45, 23.93) | (-12.93, 11.18) | (-2.15, 23.63) | (-10.93, 7.07) |
| Pandemic lockdowns - change in level | -73.84*** | 103.44** | 127.82** | 20.49 | 46.02 | -23.1 |
|  | (-109.29, -38.38) | (25.70, 181.17) | (37.57, 218.07) | (-91.45, 132.43) | (-64.31, 156.35) | (-132.07, 85.87) |
| Pandemic lockdowns- change in slope | 4.36* | -9.83* | -16.26** | -0.12 | -11.06 | 3.71 |
|  | (0.21, 8.51) | (-18.94, -0.72) | (-27.20, -5.31) | (-13.13, 12.90) | (-24.76, 2.64) | (-6.73, 14.15) |
| Post-lockdown - change in level | -76.14** | 41.68 | 30.73 | -133 | -26.62 | 61.2 |
|  | (-122.87, -29.41) | (-61.16, 144.52) | (-89.97, 151.42) | (-278.07, 12.06) | (-176.34, 123.10) | (-103.07, 225.48) |
| Post-lockdown - change in slope | 3.35 | -6.11 | -12.47* | 4.6 | -9.04 | 1.38 |
|  | (-0.67, 7.36) | (-14.87, 2.65) | (-23.12, -1.81) | (-7.97, 17.17) | (-22.47, 4.38) | (-8.64, 11.40) |

Note: 95% confidence interval is in the parentheses. ***p-value <0.001, **p-value<0.01, *p-value<0.05. Estimates for Black, Asian, Mixed and Other are expressed relative to White. For example, the change is level in the pandemic period for individuals of Black ethnicity compared to White is -£73.84 plus £103.44, which equals £29.60. If coefficients for ethnicities other than ‘White’ are not significant, this means that they are not significantly different from White.

# Table S9. Predicted and counterfactual monthly pregnancy costs – By ethnicity

|  | White – Baseline | | Black | | Asian | | Mixed | | Other | | Missing | |
| --- | --- | --- | --- | --- | --- | --- | --- | --- | --- | --- | --- | --- |
|  | Average cost | 95% CI | Average cost | 95% CI | Average cost | 95% CI | Average cost | 95% CI | Average cost | 95% CI | Average cost | 95% CI |
| Jun-19 | 1038.53 | (1016.91,1060.15) | 992.65 | (959.86,1025.43) | 1059.98 | (1010.7,1109.26) | 982.68 | (916.69,1048.67) | 1118.93 | (1063.59,1174.26) | 864.20 | (825.39,903.01) |
| Jul-19 | 909.64 | (890.56,928.73) | 1102.15 | (1074.02,1130.28) | 1000.06 | (958.52,1041.6) | 1003.17 | (947.87,1058.47) | 1066.79 | (1020.27,1113.31) | 1067.18 | (1034.65,1099.72) |
| Aug-19 | 878.08 | (860.87,895.29) | 1124.42 | (1100.14,1148.71) | 970.28 | (935.29,1005.27) | 798.18 | (752.1,844.26) | 1182.51 | (1143.25,1221.77) | 1154.19 | (1126.36,1182.02) |
| Sep-19 | 883.35 | (867.31,899.38) | 1024.13 | (1002.45,1045.81) | 1007.81 | (977.55,1038.06) | 981.29 | (941.86,1020.73) | 1153.68 | (1119.43,1187.94) | 1264.55 | (1239.05,1290.05) |
| Oct-19 | 1065.89 | (1050.21,1081.57) | 1057.20 | (1036.41,1077.99) | 811.51 | (783.26,839.76) | 911.38 | (874.7,948.07) | 1003.64 | (971.05,1036.22) | 943.81 | (917.79,969.84) |
| Nov-19 | 981.11 | (964.94,997.27) | 1028.75 | (1007.02,1050.48) | 914.00 | (884.4,943.6) | 869.39 | (830.82,907.96) | 869.88 | (835.16,904.61) | 1073.13 | (1043.65,1102.6) |
| Dec-19 | 940.74 | (923.43,958.05) | 1056.48 | (1032.09,1080.86) | 976.44 | (942.6,1010.27) | 951.90 | (907.25,996.56) | 1174.34 | (1134.2,1214.49) | 1163.13 | (1128.06,1198.2) |
| Jan-20 | 1033.61 | (1014.38,1052.84) | 1100.45 | (1072.13,1128.78) | 1050.85 | (1010.73,1090.97) | 1131.28 | (1077.86,1184.7) | 1003.57 | (955.75,1051.4) | 1296.93 | (1255.01,1338.85) |
| Feb-20 | 918.56 | (897.11,940.01) | 1005.12 | (972.28,1037.96) | 989.30 | (941.78,1036.83) | 926.97 | (863.25,990.69) | 1149.07 | (1092.67,1205.47) | 979.34 | (929.92,1028.77) |
| Mar-20 (start of the pandemic period) | 953.98 | (935.24,972.72) | 1003.65 | (977.19,1030.11) | 1020.65 | (984,1057.31) | 932.48 | (883.27,981.69) | 988.25 | (945.85,1030.65) | 1309.45 | (1257.38,1361.51) |
| Apr-20 | 894.02 | (875.84,912.21) | 1024.63 | (999.76,1049.49) | 943.70 | (909.94,977.46) | 748.57 | (703.53,793.6) | 727.09 | (688.21,765.96) | 1163.15 | (1115.39,1210.92) |
| May-20 | 905.38 | (887.43,923.33) | 1049.09 | (1025.54,1072.65) | 962.75 | (931.46,994.05) | 1090.02 | (1048.66,1131.37) | 1074.33 | (1038.33,1110.33) | 1080.44 | (1036.55,1124.32) |
| Jun-20 | 956.98 | (940.47,973.49) | 1010.56 | (989.16,1031.97) | 1034.76 | (1006.42,1063.1) | 904.81 | (867.46,942.16) | 903.12 | (870.82,935.42) | 762.15 | (722.4,801.9) |
| Jul-20 | 1006.47 | (990.74,1022.21) | 1173.18 | (1153.16,1193.19) | 949.63 | (923.61,975.64) | 1111.77 | (1077.82,1145.71) | 987.53 | (958.03,1017.03) | 951.38 | (915.09,987.66) |
| Aug-20 | 932.31 | (917.15,947.46) | 944.34 | (925.43,963.25) | 888.91 | (864.74,913.09) | 1022.41 | (991.22,1053.6) | 1073.55 | (1046.36,1100.74) | 991.41 | (957.79,1025.03) |
| Sep-20 | 937.22 | (922.34,952.1) | 1161.59 | (1143.4,1179.78) | 1187.03 | (1164.09,1209.97) | 1076.84 | (1047.62,1106.05) | 1347.05 | (1321.36,1372.75) | 1160.00 | (1128.32,1191.68) |
| Oct-20 | 1025.88 | (1011.1,1040.66) | 1106.64 | (1088.75,1124.52) | 1172.77 | (1150.42,1195.13) | 785.18 | (757.11,813.25) | 945.34 | (920.47,970.2) | 1225.47 | (1194.61,1256.32) |
| Nov-20 | 949.03 | (934.22,963.85) | 1081.23 | (1063.3,1099.17) | 1025.81 | (1003.44,1048.19) | 838.97 | (811.04,866.91) | 1030.06 | (1005.49,1054.62) | 1053.52 | (1022.06,1084.97) |
| Dec-20 | 874.40 | (859.36,889.45) | 986.69 | (968.15,1005.23) | 946.52 | (923.48,969.57) | 871.85 | (842.97,900.73) | 877.93 | (852.65,903.21) | 968.30 | (936.04,1000.57) |
| Jan-21 | 976.69 | (960.99,992.39) | 1134.68 | (1115.19,1154.18) | 912.93 | (888.41,937.46) | 860.62 | (829.75,891.49) | 1026.81 | (999.88,1053.73) | 719.60 | (685.04,754.16) |
| Feb-21 | 971.05 | (954.73,987.37) | 868.44 | (847.84,889.04) | 1004.53 | (978.02,1031.03) | 1136.62 | (1103.13,1170.11) | 1011.65 | (982.51,1040.78) | 879.38 | (841.87,916.88) |
| Mar-21 | 993.11 | (976.28,1009.94) | 1169.23 | (1147.26,1191.2) | 897.63 | (869.11,926.14) | 896.13 | (859.58,932.68) | 1006.34 | (974.68,1038) | 1220.29 | (1179.33,1261.25) |
| Apr-21 | 957.71 | (940.2,975.22) | 983.65 | (960.14,1007.15) | 942.10 | (911.02,973.19) | 1314.95 | (1274.7,1355.2) | 1016.04 | (981.4,1050.68) | 757.99 | (713.23,802.74) |
| May-21 | 987.02 | (968.43,1005.62) | 1034.25 | (1008.87,1059.62) | 998.12 | (964.08,1032.16) | 906.41 | (862.18,950.65) | 992.97 | (954.84,1031.09) | 886.22 | (837.15,935.29) |
| Jun-21 | 951.76 | (932.9,970.62) | 1084.50 | (1057.74,1111.25) | 955.41 | (918.81,992.02) | 984.36 | (936.2,1032.52) | 1148.90 | (1107.49,1190.3) | 830.44 | (777.03,883.86) |
| Jul-21 (start of post-lockdown period) | 1024.14 | (1006.77,1041.5) | 1110.27 | (1085.92,1134.62) | 1052.22 | (1020.31,1084.12) | 860.80 | (818.76,902.84) | 1043.67 | (1004.58,1082.76) | 1195.31 | (1150.78,1239.83) |
| Aug-21 | 970.82 | (954,987.65) | 1142.61 | (1119.64,1165.59) | 1031.33 | (1001.4,1061.26) | 722.13 | (682.86,761.4) | 1176.33 | (1139.69,1212.96) | 809.03 | (767.57,850.5) |
| Sep-21 | 1006.23 | (989.9,1022.55) | 1021.23 | (999.42,1043.05) | 1069.49 | (1041.27,1097.71) | 976.35 | (939.61,1013.1) | 1036.42 | (1002.06,1070.78) | 1652.51 | (1613.84,1691.17) |
| Oct-21 | 1107.82 | (1091.84,1123.8) | 1104.45 | (1083.65,1125.25) | 1188.32 | (1161.62,1215.02) | 975.56 | (941.21,1009.92) | 1110.15 | (1077.99,1142.31) | 1049.71 | (1013.62,1085.8) |
| Nov-21 | 1053.58 | (1037.94,1069.22) | 1234.73 | (1214.78,1254.67) | 976.47 | (951.33,1001.62) | 1002.75 | (970.59,1034.91) | 1127.47 | (1097.21,1157.74) | 1302.30 | (1268.84,1335.75) |
| Dec-21 | 1025.88 | (1010.4,1041.35) | 1135.32 | (1116.09,1154.55) | 876.10 | (852.44,899.75) | 1166.18 | (1135.98,1196.38) | 1160.78 | (1132.21,1189.35) | 743.99 | (712.77,775.22) |
| Jan-22 | 1001.05 | (985.57,1016.53) | 1090.64 | (1071.87,1109.41) | 1047.73 | (1025.06,1070.41) | 1134.69 | (1106.05,1163.34) | 1113.47 | (1086.26,1140.68) | 1002.37 | (973.04,1031.7) |
| Feb-22 | 925.24 | (909.72,940.75) | 1109.90 | (1091.47,1128.32) | 957.51 | (935.65,979.36) | 937.60 | (910.37,964.83) | 958.47 | (932.48,984.46) | 1058.54 | (1030.54,1086.54) |
| Mar-22 | 1087.91 | (1072.85,1102.97) | 1031.60 | (1013.88,1049.33) | 1025.69 | (1004.83,1046.54) | 1168.26 | (1142.32,1194.2) | 1207.58 | (1182.73,1232.43) | 1475.13 | (1448.56,1501.69) |
| Apr-22 | 1003.86 | (988.75,1018.97) | 1195.23 | (1177.42,1213.03) | 996.52 | (976.02,1017.02) | 1094.53 | (1069.3,1119.76) | 1092.65 | (1068.15,1117.15) | 1040.25 | (1014.39,1066.11) |

Notes: Analyses were based on data up to April 2023 (results available upon request).

# Figure S4. Predicted monthly pregnancy costs and the impact of implementing and lifting the lockdowns – By ethnicity


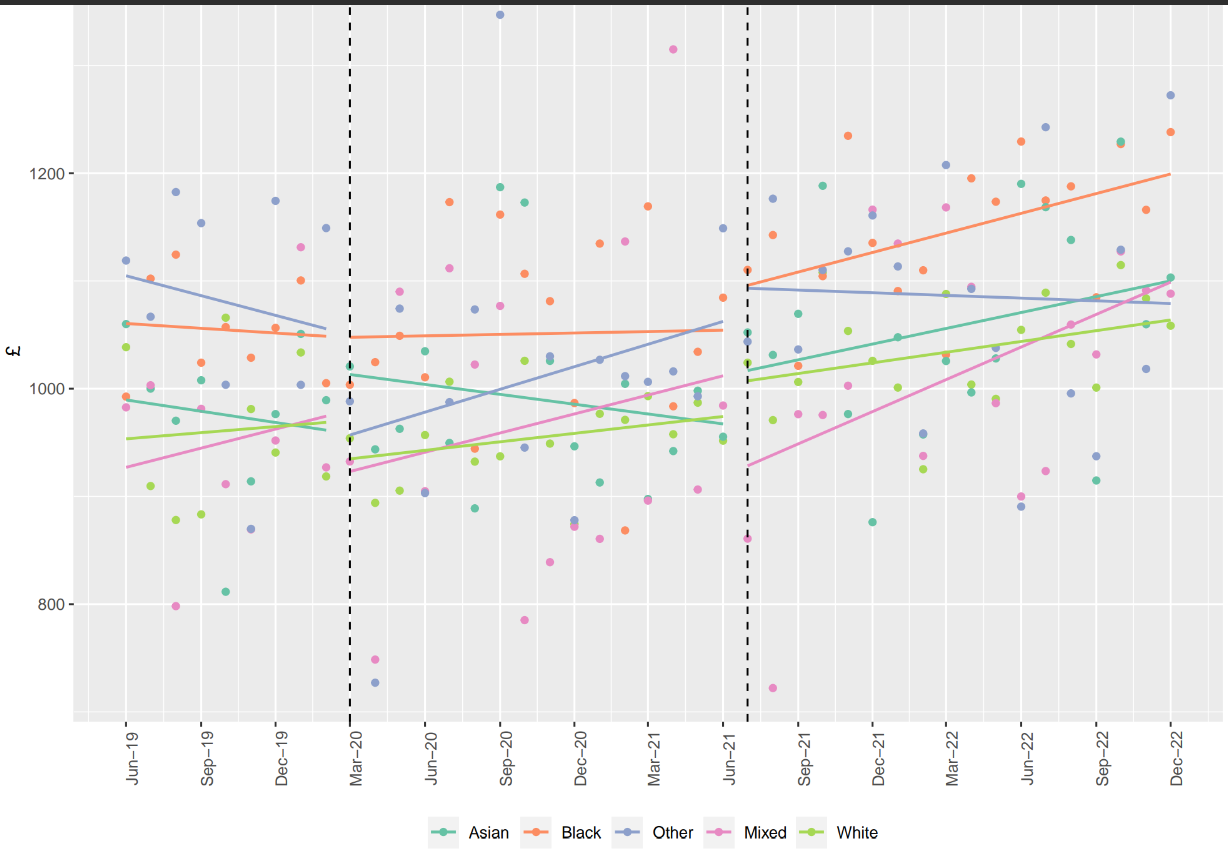


# Table S10. Parameter estimates from the cross-sectional models assessing the impact of virtual care on utilisation types and delivery costs

|  | **Parameter estimate (95% CI)** | | | | | |
| --- | --- | --- | --- | --- | --- | --- |
|  | **Antenatal appointments** | **MAU appointments** | **Postnatal appointments** | **Primary care consultations** | **Mental health use (yes/no)** | **Delivery costs** |
| Virtual care | 0.002*** (0.002, 0.003) | 0.01*** (0.01, 0.01) | -0.002*** (-0.003, -0.001) | 0.002 (-0.0001, 0.004) | 0.002 (-0.003, 0.01) | 0.001*** (0.0004, 0.001) |
| Proportion of care during the pandemic | 0.15*** (0.07, 0.24) | -0.11 (-0.26, 0.03) | -0.21*** (-0.33, -0.10) | 0.30* (0.003, 0.59) | -0.91** (-1.50, -0.31) | -0.02 (-0.07, 0.03) |
| Age (years) | 0.01*** (0.005, 0.01) | -0.02*** (-0.02, -0.02) | 0.002** (0.001, 0.004) | -0.002 (-0.005, 0.002) | -0.02*** (-0.03, -0.01) | 0.003*** (0.003, 0.004) |
| Ethnicity |  |  |  |  |  |  |
| Black | 0.12*** (0.11, 0.13) | 0.002 (-0.02, 0.03) | -0.001 (-0.02, 0.02) | 0.15*** (0.10, 0.20) | 0.26*** (0.17, 0.35) | -0.0004 (-0.01, 0.01) |
| Asian | 0.05*** (0.04, 0.07) | 0.05** (0.02, 0.09) | 0.002 (-0.03, 0.03) | 0.14*** (0.06, 0.22) | -0.05 (-0.20, 0.11) | 0.02* (0.003, 0.03) |
| Mixed | 0.08*** (0.06, 0.10) | 0.02 (-0.03, 0.06) | -0.03 (-0.07, 0.02) | 0.13*** (0.05, 0.20) | 0.12 (-0.02, 0.26) | -0.01 (-0.03, 0.004) |
| Other | 0.05*** (0.03, 0.06) | 0.01 (-0.03, 0.05) | 0.01 (-0.02, 0.04) | 0.05 (-0.02, 0.12) | 0.14 (-0.02, 0.30) | 0.003 (-0.01, 0.02) |
| Missing | -0.04*** (-0.06, -0.02) | -0.16*** (-0.20, -0.12) | 0.05*** (0.02, 0.08) | 0.01 (-0.06, 0.07) | -0.08 (-0.24, 0.08) | -0.02*** (-0.04, -0.01) |
| IMD |  |  |  |  |  |  |
| Quintile 2 | 0.0001 (-0.01, 0.01) | 0.01 (-0.02, 0.04) | -0.02 (-0.04, 0.002) | -0.04 (-0.08, 0.01) | 0.03 (-0.06, 0.13) | -0.002 (-0.01, 0.01) |
| Quintile 3 | -0.01 (-0.02, 0.005) | -0.01 (-0.04, 0.02) | -0.11*** (-0.13, -0.08) | -0.08** (-0.14, -0.03) | -0.04 (-0.15, 0.07) | 0.01* (0.0002, 0.02) |
| Quintile 4 | 0.01 (-0.004, 0.03) | -0.01 (-0.05, 0.03) | -0.20*** (-0.23, -0.16) | -0.17*** (-0.25, -0.09) | -0.29*** (-0.46, -0.13) | 0.01 (-0.004, 0.02) |
| Quintile 5 | 0.04** (0.01, 0.06) | -0.12*** (-0.18, -0.06) | -0.27*** (-0.32, -0.21) | -0.30*** (-0.47, -0.14) | -0.46*** (-0.72, -0.20) | 0.01 (-0.01, 0.03) |
| Missing | 0.01 (-0.03, 0.05) | 0.01 (-0.06, 0.08) | -0.21*** (-0.29, -0.14) | -0.11 (-0.31, 0.09) | -0.29 (-0.66, 0.08) | 0.01 (-0.02, 0.04) |
| Smoking status |  |  |  |  |  |  |
| Smoker | 0.05*** (0.02, 0.07) | -0.07* (-0.12, -0.01) | 0.09*** (0.04, 0.13) | 0.004 (-0.11, 0.11) | 0.38*** (0.26, 0.50) | -0.04*** (-0.06, -0.02) |
| Smoking status missing | -0.05*** (-0.07, -0.03) | -0.05 (-0.09, 0.001) | -0.001 (-0.04, 0.04) | 0.03 (-0.05, 0.12) | 0.16 (-0.003, 0.33) | 0.002 (-0.01, 0.02) |
| Multiple births | 0.35*** (0.32, 0.39) | 0.17*** (0.09, 0.24) | 0.35*** (0.30, 0.40) | 0.02 (-0.10, 0.14) | -0.07 (-0.34, 0.20) | 0.86*** (0.84, 0.87) |
| Antenatal care type |  |  |  |  |  |  |
| Obstetrician | 0.08** (0.03, 0.14) | -0.15** (-0.26, -0.04) | 0.08* (0.01, 0.15) | -0.06 (-0.28, 0.17) | 0.15 (-0.20, 0.50) | 0.09*** (0.06, 0.12) |
| Shared | 0.19*** (0.18, 0.20) | 0.02* (0.001, 0.04) | 0.02* (0.0002, 0.04) | 0.06** (0.02, 0.10) | 0.23*** (0.14, 0.32) | 0.04*** (0.03, 0.05) |
| Missing | -0.66*** (-0.88, -0.45) | -0.52*** (-0.70, -0.34) | 0.07 (-0.09, 0.24) | -0.19 (-0.46, 0.09) | 0.52 (-0.02, 1.06) | 0.01 (-0.04, 0.06) |
| Difficulty speaking English | -0.01 (-0.02, 0.004) | -0.01 (-0.03, 0.01) | -0.01 (-0.03, 0.005) | 0.07** (0.02, 0.11) | 0.11* (0.01, 0.20) | 0.0004 (-0.01, 0.01) |
| Physical conditions | 0.12*** (0.11, 0.13) | 0.15*** (0.13, 0.17) | 0.02** (0.01, 0.04) | 0.19*** (0.15, 0.23) | 0.21*** (0.14, 0.29) | 0.02*** (0.01, 0.02) |
| Mental health conditions | 0.03*** (0.02, 0.04) | 0.15*** (0.12, 0.17) | 0.12*** (0.11, 0.14) | 0.27*** (0.23, 0.31) | 1.92*** (1.84, 2.01) | -0.0005 (-0.01, 0.01) |
| GDM | 0.30*** (0.29, 0.31) | -0.02 (-0.05, 0.02) | 0.06*** (0.03, 0.08) | 0.18*** (0.12, 0.23) | 0.01 (-0.10, 0.12) | 0.03*** (0.02, 0.04) |
| Gestation at booking (weeks) | -0.04*** (-0.05, -0.04) | -0.02*** (-0.03, -0.02) | 0.002*** (0.001, 0.003) | -0.03*** (-0.04, -0.03) | -0.02*** (-0.03, -0.01) | -0.0002 (-0.001, 0.0003) |
| Constant | 2.18*** (2.13, 2.23) | 1.45*** (1.36, 1.54) | 1.30*** (1.23, 1.38) | 1.95*** (1.79, 2.11) | -2.95*** (-3.29, -2.60) | 8.28*** (8.25, 8.31) |

Notes: *p<0.05; **p<0.01; ***p<0.001. IMD=Index of Multiple Deprivation. GDM=Gestational Diabetes Mellitus. Model also controls for month of booking appointment and hospital. Reference group for ethnicity is "White", and reference group for antenatal care type is "Midwife only" care. Multiple births, difficulty speaking English, physical condition, mental health condition and GDM are all yes/no variables, with “no” as the reference category. Count models were estimated using a GLM model with a negative binomial distribution and the log link. Mental health use (talking therapy, community contacts and inpatient stays) was modelled as a binary yes/no dependent variable due to relative low use and estimated using logistic regression. Delivery costs were estimated using OLS.

# Table s11. Parameter estimates from the cross-sectional models assessing the impact of self-monitoring on utilisation types and delivery costs

|  | **Parameter estimate (95% CI)** | | | | |
| --- | --- | --- | --- | --- | --- |
|  | **Antenatal appointments** | **MAU appointments** | **Postnatal appointments** | **Primary care consultations** | **Delivery costs** |
| Self-monitoring | 0.08*** (0.04, 0.11) | 0.07 (-0.02, 0.16) | -0.0002 (-0.07, 0.07) | -0.07 (-0.20, 0.05) | -0.02 (-0.04, 0.01) |
| Proportion of care during the pandemic | 0.04 (-0.18, 0.26) | -0.17 (-0.70, 0.36) | -0.34 (-0.74, 0.06) | 0.42 (-0.64, 1.49) | 0.004 (-0.16, 0.17) |
| Age (years) | 0.01*** (0.01, 0.01) | -0.01** (-0.01, -0.002) | 0.004 (-0.0002, 0.01) | 0.004 (-0.01, 0.01) | 0.002* (0.0005, 0.004) |
| Ethnicity |  |  |  |  |  |
| Black | 0.09*** (0.06, 0.11) | -0.03 (-0.11, 0.04) | 0.01 (-0.05, 0.06) | 0.13* (0.002, 0.26) | 0.03 (-0.0002, 0.05) |
| Asian | 0.01 (-0.02, 0.04) | 0.01 (-0.08, 0.09) | -0.01 (-0.08, 0.06) | 0.05 (-0.10, 0.21) | -0.003 (-0.03, 0.02) |
| Mixed | 0.04 (-0.01, 0.09) | -0.08 (-0.25, 0.08) | -0.02 (-0.15, 0.11) | 0.32** (0.10, 0.54) | -0.01 (-0.06, 0.03) |
| Other | 0.01 (-0.02, 0.05) | -0.03 (-0.14, 0.08) | 0.04 (-0.05, 0.13) | 0.09 (-0.10, 0.27) | -0.004 (-0.04, 0.03) |
| Missing | -0.05 (-0.10, 0.002) | -0.11 (-0.25, 0.03) | 0.13* (0.02, 0.23) | 0.14 (-0.06, 0.35) | -0.03 (-0.08, 0.02) |
| IMD |  |  |  |  |  |
| Quintile 2 | -0.01 (-0.03, 0.02) | 0.02 (-0.05, 0.10) | -0.03 (-0.09, 0.03) | -0.13* (-0.25, -0.004) | -0.01 (-0.03, 0.02) |
| Quintile 3 | -0.02 (-0.05, 0.01) | 0.06 (-0.03, 0.15) | -0.11** (-0.18, -0.04) | -0.10 (-0.24, 0.04) | 0.02 (-0.01, 0.05) |
| Quintile 4 | -0.02 (-0.06, 0.02) | 0.09 (-0.04, 0.23) | -0.26*** (-0.37, -0.15) | -0.28* (-0.54, -0.03) | 0.03 (-0.01, 0.07) |
| Quintile 5 (Least deprived) | 0.005 (-0.05, 0.06) | -0.01 (-0.22, 0.19) | -0.38*** (-0.53, -0.23) | -0.45* (-0.84, -0.07) | -0.02 (-0.07, 0.03) |
| Missing | 0.09 (-0.002, 0.18) | 0.17 (-0.06, 0.40) | -0.14 (-0.36, 0.08) | 0.14 (-0.26, 0.53) | -0.01 (-0.10, 0.09) |
| Smoking status |  |  |  |  |  |
| Smoker | 0.02 (-0.03, 0.08) | -0.16 (-0.32, 0.01) | 0.08 (-0.11, 0.27) | -0.01 (-0.35, 0.34) | 0.003 (-0.06, 0.07) |
| Smoking status missing | -0.05 (-0.10, 0.01) | 0.0005 (-0.16, 0.16) | 0.004 (-0.13, 0.13) | 0.15 (-0.08, 0.37) | 0.001 (-0.05, 0.05) |
| Antenatal care type |  |  |  |  |  |
| Shared | 0.16*** (0.14, 0.19) | 0.03 (-0.05, 0.11) | 0.05 (-0.02, 0.11) | 0.11 (-0.19, 0.40) | 0.02 (-0.004, 0.05) |
| Obstetrician only | 0.20*** (0.10, 0.30) | 0.24 (-0.04, 0.52) | 0.08 (-0.10, 0.26) | 0.31 (-0.17, 0.79) | 0.12** (0.04, 0.21) |
| Missing | -0.45 (-0.93, 0.03) | 0.27 (-0.40, 0.95) | -0.47 (-1.26, 0.31) | 0.17* (0.03, 0.31) | 0.12 (-0.09, 0.33) |
| Multiple births | 0.17*** (0.11, 0.24) | 0.15 (-0.01, 0.31) | 0.37*** (0.25, 0.50) | -23.43*** (-25.55, -21.31) | 0.86*** (0.81, 0.90) |
| English speaker | -0.01 (-0.03, 0.01) | 0.05 (-0.02, 0.11) | -0.01 (-0.06, 0.04) | 0.17** (0.06, 0.27) | 0.002 (-0.02, 0.02) |
| Physical condition | 0.10*** (0.08, 0.12) | 0.18*** (0.12, 0.25) | -0.04 (-0.09, 0.01) | 0.14** (0.04, 0.23) | 0.03** (0.01, 0.05) |
| Mental health condition | 0.03* (0.002, 0.05) | 0.19*** (0.12, 0.26) | 0.12*** (0.07, 0.18) | 0.28*** (0.16, 0.40) | 0.003 (-0.02, 0.03) |
| Gestation at booking (weeks) | -0.03*** (-0.04, -0.03) | -0.02*** (-0.03, -0.01) | 0.004 (-0.001, 0.01) | -0.03*** (-0.04, -0.03) | 0.0000 (-0.002, 0.002) |
| Constant | 2.44*** (2.32, 2.56) | 0.84*** (0.52, 1.15) | 1.17*** (0.94, 1.41) | 1.72*** (1.19, 2.25) | 8.29*** (8.18, 8.39) |

Notes: *p<0.05; **p<0.01; ***p<0.001. IMD=Index of Multiple Deprivation. Model also controls for month of booking appointment and hospital. Reference group for ethnicity is "White", and reference group for antenatal care type is "Midwife only" care. Multiple births, difficulty speaking English, physical condition, mental health condition and GDM are all yes/no variables, with “no” as the reference category. Count models were estimated using a GLM model with a negative binomial distribution and the log link. Mental health use (talking therapy, community contacts and inpatient stays) was modelled as a binary yes/no dependent variable due to relative low use and estimated using logistic regression. Delivery costs were estimated using OLS. The mental health model did not converge and, thus, parameter estimates are not presented.

# Table S12. The impact of virtual care on pregnancy costs by subgroups

| **Control** | **Ethnicity** | **IMD Quintiles** | **Two Most Deprived Quintiles** | **Difficulty Speaking English** | **Mental Health Condition** |
| --- | --- | --- | --- | --- | --- |
| Virtual care | 7.86*** (3.53, 12.19) | 9.35* (1.06, 17.64) | 5.11* (0.78, 9.45) | 6.99*** (3.44, 10.53) | 5.71** (2.09, 9.32) |
| Virtual care*Ethnicity - Black | 0.98 (-8.07, 10.03) |  |  |  |  |
| Virtual care*Ethnicity - Asian | -0.93 (-9.66, 7.80) |  |  |  |  |
| Virtual care*Ethnicity - Mixed | -8.31 (-20.18, 3.57) |  |  |  |  |
| Virtual care*Ethnicity - Other | -7.44 (-17.21, 2.33 |  |  |  |  |
| Virtual care*Ethnicity - Missing | -1.84 (-11.75, 8.07) |  |  |  |  |
| Virtual care*IMD – Quintile 2 |  | -1.58 (-10.73, 7.57) |  |  |  |
| Virtual care*IMD – Quintile 3 |  | -4.78 (-14.36, 4.80) |  |  |  |
| Virtual care*IMD – Quintile 4 |  | 0.98 (-10.29, 12.25) |  |  |  |
| Virtual care*IMD – Quintile 5 (least deprived) |  | -5.98 (-19.69, 7.73) |  |  |  |
| Virtual care*IMD – Missing |  | -16.90 (-40.85, 7.06) |  |  |  |
| Virtual care* Most deprived two quintiles |  |  | 3.11 (-2.54, 8.76) |  |  |
| Virtual care*Difficulty speaking English |  |  |  | 0.15 (-9.75, 10.04) |  |
| Virtual care*Mental health condition |  |  |  |  | 4.57 (-2.61, 11.74) |

Notes: All models also adjust for proportion of care doing the pandemic, age (years), ethnicity, IMD, smoking status, antenatal care type, multiple births, difficulty speaking English, physical condition, mental health condition, and gestation at antenatal registration (weeks). The unit of measurement is pregnancy costs (£).

# Table S13. The impact of GDM app registration on pregnancy costs by subgroups

| Control | Ethnicity | IMD Quintiles | Two Most Deprived Quintiles | Difficulty Speaking English | Mental Health Condition |
| --- | --- | --- | --- | --- | --- |
| Self-monitoring | 159.97 (-145.79, 465.74) |  |  |  |  |
| Self-monitoring *Ethnicity - Black | -231.94 (-694.29, 230.41) |  |  |  |  |
| Self-monitoring *Ethnicity - Asian | 77.23 (-377.20, 531.65) |  |  |  |  |
| Self-monitoring *Ethnicity - Mixed | -103.88 (-857.42, 649.67) |  |  |  |  |
| Self-monitoring *Ethnicity - Other | 44.67 (-558.78, 648.11) |  |  |  |  |
| Self-monitoring *Ethnicity - Missing | 397.55 (-344.14, 1,139.24) |  |  |  |  |
| Self-monitoring *IMD – Quintile 2 |  | -163.92 (-592.49, 264.66) |  |  |  |
| Self-monitoring *IMD – Quintile 3 |  | -447.47 (-941.85, 46.91) |  |  |  |
| Self-monitoring *IMD – Quintile 4 |  | 85.41 (-613.37, 784.19) |  |  |  |
| Self-monitoring *IMD – Quintile 5 (least deprived) |  | -168.18 (-937.68, 601.32) |  |  |  |
| Self-monitoring *IMD – Missing |  | 2,211.65** (731.05, 3,692.24) |  |  |  |
| Self-monitoring * Most deprived two quintiles |  |  | 171.55 (-225.00, 568.10) |  |  |
| Self-monitoring *Difficulty speaking English |  |  |  | 462.40 (-32.46, 957.26) |  |
| Self-monitoring *Mental health condition |  |  |  |  | 95.74 (-338.75, 530.23) |

Notes: All models also adjust for proportion of care doing the pandemic, age (years), ethnicity, IMD, smoking status, antenatal care type, multiple births, difficulty speaking English, physical condition, mental health condition, and gestation at antenatal registration (weeks). The unit of measurement is pregnancy costs (£).

# Table S14. Goodness of fit measures comparing OLS to GLM with gamma distribution and log link

Two regression models were compared, Ordinary Least Squares (OLS) and a Generalised Linear Model (GLM) with the Gamma distribution and the log link. R2 was generated to understand the proportion of the variation in costs explained by each model. Mean absolute errors (MAE), mean squared errors (MSE), and root mean squared error (RMSE) were computed to assess predictive accuracy, with lower values indicating better accuracy. A logged dependent variable model was also considered but, as residuals were non-normally distributed and heteroskedastic (analyses available upon request), the smearing estimator to address the retransformation problem was not used.

| **ITS Model** |  |  |
| --- | --- | --- |
|  |  |  |
| **Results of Breusch-Pagan test** | |  |
| BP | 12962 |  |
| Df | 23 |  |
| p-value | <0.001 |  |
|  |  |  |
|  | **OLS** | **Gamma** |
| R-squared | 0.839 | 0.821 |
| MAE | 381 | 394 |
| MSE | 673230 | 761417 |
| RMSE | 821 | 873 |
|  |  |  |
| **Self-Monitoring** |  |  |
|  |  |  |
| **Results of Breusch-Pagan test** | |  |
| BP | 134.64 |  |
| Df | 76 |  |
| p-value | <0.001 |  |
|  |  |  |
|  | **OLS** | **Gamma** |
| R-squared | 0.331 | 0.330 |
| MAE | 1845 | 1843 |
| MSE | 5527290 | 5538171 |
| RMSE | 2351 | 2353 |
|  |  |  |
| **Virtual Care** |  |  |
|  |  |  |
| **Results of Breusch-Pagan test** | |  |
| BP | 159 |  |
| Df | 78 |  |
| p-value | <0.001 |  |
|  |  |  |
|  | **OLS** | **Gamma** |
| R-squared | 0.276 | 0.276 |
| MAE | 1786 | 1786 |
| MSE | 5556333 | 5553209 |
| RMSE | 2357 | 2357 |

Note:The unit of measurement is pregnancy costs (£).

| Table S15. Results of sensitivity analyses for ITS Model assessing the impact of the pandemic on monthly pregnancy costs - Removing primary care from pregnancy costs | | |
| --- | --- | --- |
| **Control** | **Parameter estimate** | **95% CI** |
| Constant | 130.00*** | (106.76, 153.24) |
| Time | 3.43* | (0.18, 6.68) |
| Pandemic - change in level | -35.61* | (-62.97, -8.25) |
| Pandemic - change in slope | 0.43 | (-2.95, 3.81) |
| Post lockdown - change in level | -70.10*** | (-105.92, -34.28) |
| Post lockdown - change in slope | 0.76 | (-2.53, 4.05) |
| Delivery | 5,655.56*** | (5,632.99, 5,678.13) |
| Ethnicity |  |  |
| Black | 51.06*** | (41.33, 60.79) |
| Asian | 33.26*** | (21.96, 44.57) |
| Mixed | 1.3 | (-12.86, 15.47) |
| Other | 16.56* | (2.34, 30.78) |
| Missing | -40.73*** | (-55.13, -26.34) |
| Note: *p<0.05; **p<0.01; ***p<0.001. Costs exclude primary care. Model also contains control for month, hospital and lagged residuals. Reference group for ethnicity is "White". The unit of measurement is monthly pregnancy costs (£). | | |
|  |  |  |
|  |  |  |
| Table S16. Results of sensitivity analyses for ITS Model assessing the impact of the pandemic on monthly pregnancy costs -Changing routine antenatal costing assumption | | |
| **Control** | **Parameter estimate** | **95% CI** |
| Constant | 137.82*** | (114.66, 160.99) |
| Time | 3.49* | (0.25, 6.74) |
| Pandemic - change in level | -37.55** | (-64.83, -10.26) |
| Pandemic - change in slope |  |  |
| Post lockdown - change in level | -73.37 | (-109.07, -37.66) |
| Post lockdown - change in slope |  |  |
| Delivery | 5,660.84*** | (5,638.30, 5,683.37) |
| Ethnicity |  |  |
| Black | 49.52*** | (39.82, 59.22) |
| Asian | 32.56*** | (21.29, 43.83) |
| Mixed | 1.78 | (-12.34, 15.91) |
| Other | 16.23* | (2.06, 30.40) |
| Missing | -39.76*** | (-54.11, -25.41) |
| Note: *p<0.05; **p<0.01; ***p<0.001. Model also contains control for month, hospital and lagged residuals. Reference group for ethnicity is "White". The unit of measurement is monthly pregnancy costs (£). | | |
|  |  |  |

| Table S17. Results of sensitivity analyses for ITS Model assessing the impact of the pandemic on monthly pregnancy costs -Changing the start of the pandemic period from July 2021to August 2021 | | |
| --- | --- | --- |
| **Control** | **Parameter estimate** | **95% CI** |
| Constant | 149.61*** | (126.44, 172.78) |
| Time | 3.19 | (-0.06, 6.43) |
| Pandemic - change in level | -34.91* | (-61.83, -7.98) |
| Pandemic - change in slope | 0.52 | (-2.88, 3.92) |
| Post lockdown - change in level | -77.07*** | (-116.48, -37.66) |
| Post lockdown - change in slope | 1.31 | (-2.03, 4.66) |
| Delivery | 5,659.14*** | (5,636.56, 5,681.72) |
| Ethnicity |  |  |
| Black | 51.26*** | (41.43, 61.08) |
| Asian | 33.45*** | (22.13, 44.77) |
| Mixed | 2.2 | (-12.02, 16.41) |
| Other | 15.71* | (1.48, 29.95) |
| Missing | -41.58*** | (-56.01, -27.15) |
| Note: *p<0.05; **p<0.01; ***p<0.001. Model also contains control for month, hospital and lagged residuals. Reference group for ethnicity is "White". The unit of measurement is monthly pregnancy costs (£). | | |
